# Supplementary material for: Long term in vivo functional stability and encapsulation reliability of using ultra-nanocrystalline diamond as an insulating coating layer for implantable microchips
Source: Royal Society of Chemistry journal article supplement (doi:10.1039/c7tb00867h), 2017-01-01
Supplement: c7tb00867h1.pdf [file c7tb00867h1.pdf]

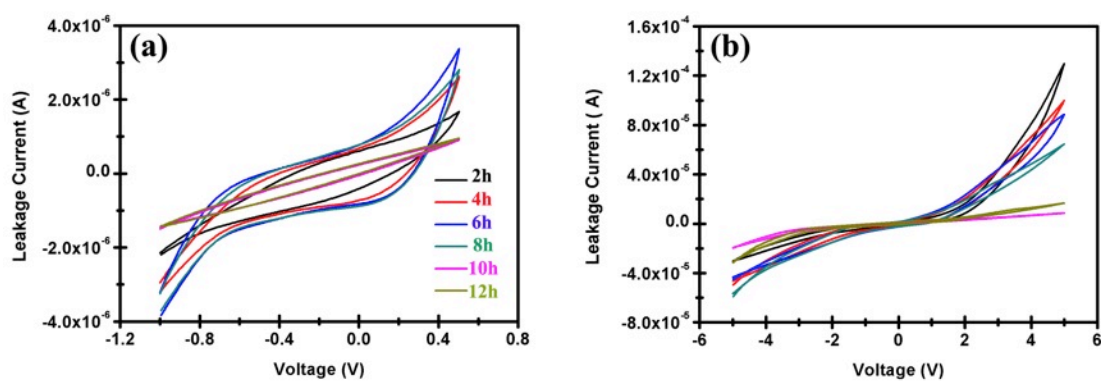

**Fig. S1**

Typical leakage current density curves recorded by applying different bias voltages between (a) -1 and +0.5 V, and (b) -5 and +5 V
